# Supplementary material for: Recurrent bacterial meningitis in children in the Netherlands: a nationwide surveillance study
Source: HighWire-hosted journal article supplement (doi:10.1136/bmjopen-2023-077887), 2023-12-01
Supplement: bmjopen-2023-077887supp001_data_supplement.pdf [file bmjopen-2023-077887supp001_data_supplement.pdf]

## Supplementary material

**Paper Title:** Recurrent bacterial meningitis in children in the Netherlands: a nationwide surveillance study

Linde Snoek<sup>1,2</sup>, Merel N. van Kassel<sup>1,2</sup>, Diederik L.H. Koelman<sup>1,2</sup>, Arie van der Ende<sup>3,4</sup>,  
Nina M. van Sorge<sup>3,4</sup>, Matthijs C. Brouwer<sup>1,2</sup>, Diederik van de Beek<sup>1,2</sup>, Merijn W. Bijlsma<sup>2,5\*</sup>

\*Corresponding author

<sup>1</sup> Department of Neurology, Amsterdam University Medical Centre location AMC, University of Amsterdam, Amsterdam, Netherlands

<sup>2</sup> Amsterdam Neuroscience, Neuroinfection and Inflammation, Amsterdam, Netherlands

<sup>3</sup> Department of Medical Microbiology and Infection Prevention, Amsterdam Institute for Infection and Immunity, Amsterdam University Medical Centre, University of Amsterdam, Amsterdam, Netherlands

<sup>4</sup> Netherlands Reference Laboratory for Bacterial Meningitis, Amsterdam University Medical Centre location AMC, Amsterdam, Netherlands

<sup>5</sup> Department of Paediatrics, Amsterdam University Medical Centre location AMC, University of Amsterdam, Amsterdam, Netherlands

**Contents**

STROBE checklist (page 3-4)

Supplementary Tables (page 5)

Supplemental Table 1 - Dutch National Immunisation Programme

Supplementary Figures (pages 6-7)

Supplemental Figure 1 - Causative pathogen of first and recurrent meningitis episodes (page 6)

Supplemental Figure 2 - Causative pathogens of recurrent and previous episodes in pathogen covered by different vaccines

References (page 8)

## STROBE checklist

|                           | Item No | Recommendation                                                                                                                                                                                                                                                                                                         | Page No |
|---------------------------|---------|------------------------------------------------------------------------------------------------------------------------------------------------------------------------------------------------------------------------------------------------------------------------------------------------------------------------|---------|
| <b>Title and abstract</b> | 1       | (a) Indicate the study's design with a commonly used term in the title or the abstract<br>(b) Provide in the abstract an informative and balanced summary of what was done and what was found                                                                                                                          | 1-3     |
| <b>Introduction</b>       |         |                                                                                                                                                                                                                                                                                                                        |         |
| Background/rationale      | 2       | Explain the scientific background and rationale for the investigation being reported                                                                                                                                                                                                                                   | 5       |
| Objectives                | 3       | State specific objectives, including any prespecified hypotheses                                                                                                                                                                                                                                                       | 5-6     |
| <b>Methods</b>            |         |                                                                                                                                                                                                                                                                                                                        |         |
| Study design              | 4       | Present key elements of study design early in the paper                                                                                                                                                                                                                                                                | 6       |
| Setting                   | 5       | Describe the setting, locations, and relevant dates, including periods of recruitment, exposure, follow-up, and data collection                                                                                                                                                                                        | 6       |
| Participants              | 6       | (a) Give the eligibility criteria, and the sources and methods of selection of participants. Describe methods of follow-up<br>(b) For matched studies, give matching criteria and number of exposed and unexposed                                                                                                      | 6       |
| Variables                 | 7       | Clearly define all outcomes, exposures, predictors, potential confounders, and effect modifiers. Give diagnostic criteria, if applicable                                                                                                                                                                               | 6-7     |
| Data sources/measurement  | 8*      | For each variable of interest, give sources of data and details of methods of assessment (measurement). Describe comparability of assessment methods if there is more than one group                                                                                                                                   | 6-7     |
| Bias                      | 9       | Describe any efforts to address potential sources of bias                                                                                                                                                                                                                                                              | 7-8     |
| Study size                | 10      | Explain how the study size was arrived at                                                                                                                                                                                                                                                                              | 6       |
| Quantitative variables    | 11      | Explain how quantitative variables were handled in the analyses. If applicable, describe which groupings were chosen and why                                                                                                                                                                                           | 6-8     |
| Statistical methods       | 12      | (a) Describe all statistical methods, including those used to control for confounding<br>(b) Describe any methods used to examine subgroups and interactions<br>(c) Explain how missing data were addressed<br>(d) If applicable, explain how loss to follow-up was addressed<br>(e) Describe any sensitivity analyses | 7-8     |
| <b>Results</b>            |         |                                                                                                                                                                                                                                                                                                                        |         |
| Participants              | 13*     | (a) Report numbers of individuals at each stage of study—eg numbers potentially eligible, examined for eligibility, confirmed eligible, included in the study, completing follow-up, and analysed<br>(b) Give reasons for non-participation at each stage<br>(c) Consider use of a flow diagram                        | 8       |
| Descriptive data          | 14*     | (a) Give characteristics of study participants (eg demographic, clinical, social) and information on exposures and potential confounders<br>(b) Indicate number of participants with missing data for each variable of interest<br>(c) Summarise follow-up time (eg, average and total amount)                         | 8-11    |
| Outcome data              | 15*     | Report numbers of outcome events or summary measures over time                                                                                                                                                                                                                                                         | 8-11    |

|                          |    |                                                                                                                                                                                                                                                                                                                                                                                                               |       |
|--------------------------|----|---------------------------------------------------------------------------------------------------------------------------------------------------------------------------------------------------------------------------------------------------------------------------------------------------------------------------------------------------------------------------------------------------------------|-------|
| Main results             | 16 | (a) Give unadjusted estimates and, if applicable, confounder-adjusted estimates and their precision (eg, 95% confidence interval). Make clear which confounders were adjusted for and why they were included<br>(b) Report category boundaries when continuous variables were categorized<br>(c) If relevant, consider translating estimates of relative risk into absolute risk for a meaningful time period | 8-11  |
| Other analyses           | 17 | Report other analyses done—eg analyses of subgroups and interactions, and sensitivity analyses                                                                                                                                                                                                                                                                                                                | 10-12 |
| <b>Discussion</b>        |    |                                                                                                                                                                                                                                                                                                                                                                                                               |       |
| Key results              | 18 | Summarise key results with reference to study objectives                                                                                                                                                                                                                                                                                                                                                      | 12-13 |
| Limitations              | 19 | Discuss limitations of the study, taking into account sources of potential bias or imprecision. Discuss both direction and magnitude of any potential bias                                                                                                                                                                                                                                                    | 14-15 |
| Interpretation           | 20 | Give a cautious overall interpretation of results considering objectives, limitations, multiplicity of analyses, results from similar studies, and other relevant evidence                                                                                                                                                                                                                                    | 15    |
| Generalisability         | 21 | Discuss the generalisability (external validity) of the study results                                                                                                                                                                                                                                                                                                                                         | 12-14 |
| <b>Other information</b> |    |                                                                                                                                                                                                                                                                                                                                                                                                               |       |
| Funding                  | 22 | Give the source of funding and the role of the funders for the present study and, if applicable, for the original study on which the present article is based                                                                                                                                                                                                                                                 | 15    |

\*Give information separately for exposed and unexposed groups.

**Supplemental Table 1. Dutch National Immunisation Programme**

| Pathogen               | Subtype    | Modification        | Eligible population                                                 | Age schedule          |
|------------------------|------------|---------------------|---------------------------------------------------------------------|-----------------------|
| <i>H. influenzae</i>   | type b     | Introduction        | Born ≥ April 1 <sup>st</sup> 1993                                   | 3, 4, 5 and 11 months |
|                        | type b     | Change              | Born ≥ January 1 <sup>st</sup> 1999                                 | 2, 3, 4 and 11 months |
| <i>N. meningitidis</i> | C          | Introduction        | Born ≥ June 1 <sup>st</sup> 2001                                    | 14 months             |
|                        | C          | Catch up (June-Nov) | Born ≥ June 1 <sup>st</sup> 1983                                    | 1-18 years            |
|                        | A, C, W, Y | Introduction        | Born ≥ May 1 <sup>st</sup> 2018                                     | 14 months             |
|                        |            |                     | Born between May 1 <sup>st</sup> and December 31 <sup>st</sup> 2004 | 14 years              |
| <i>S. pneumoniae</i>   | PCV7       | Introduction        | Born ≥ April 1 <sup>st</sup> 2006                                   | 2, 3, 4 and 11 months |
|                        | PCV10      | Introduction        | Born ≥ March 1 <sup>st</sup> 2011                                   | 2, 3, 4 and 11 months |
|                        | PCV10      | Change              | Born ≥ January 1 <sup>st</sup> 2020                                 | 3, 5 and 11 months    |

PCV7: covering serotype 4, 6B, 9V, 14, 18C, 19F and 23F; PCV10: additionally, covering serotype 1, 5 and 7F[1-3]

Supplemental Figure 1. Causative pathogen of first and recurrent meningitis episodes

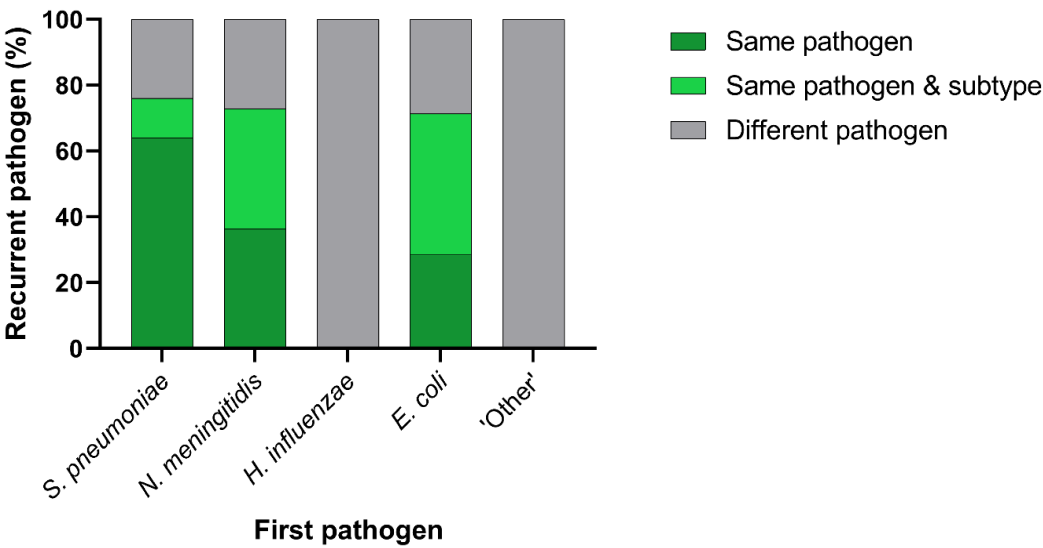

**Supplemental Figure 2. Causative pathogens of recurrent and previous episodes in pathogen covered by different vaccines**

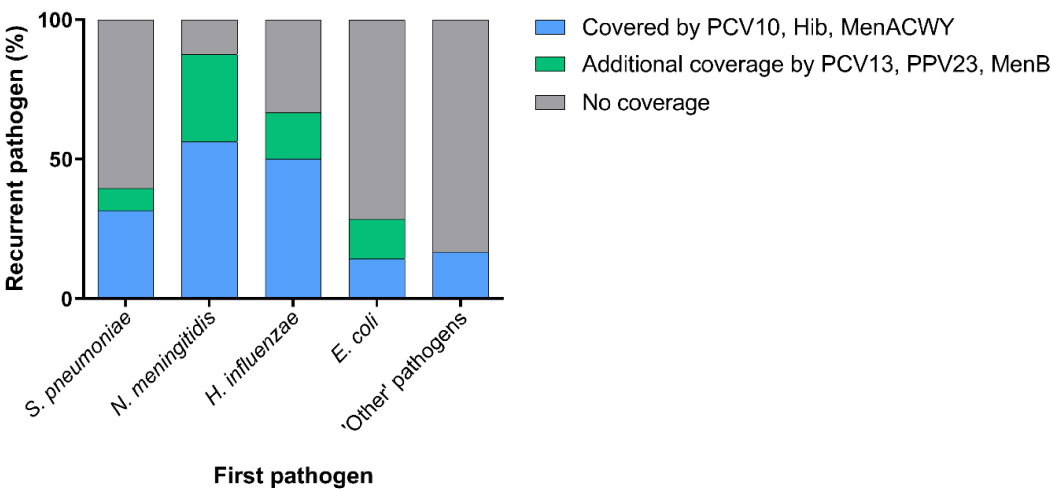

## References

1. Richtlijn Uitvoering Rijksvaccinatieprogramma 2023. Rijksinstituut voor Volksgezondheid en Milieu; 2023. p. 16-21.
2. van Alphen L, Spanjaard L, van der Ende A, Schuurman I, Dankert J. Effect of nationwide vaccination of 3-month-old infants in The Netherlands with conjugate *Haemophilus influenzae* type b vaccine: high efficacy and lack of herd immunity. *J Pediatr* 1997; **131**(6): 869-73.
3. van Oosten M, de Greeff SC, Spanjaard L, Schouls LM. Introduction of pneumococcal conjugate vaccine into the Dutch national immunisation programme. *Euro Surveill* 2006; **11**(6): E060608 2.
